# Supplementary material
Source: MDPI journal article supplement (https://www.mdpi.com/2073-4352/14/1/43)
Supplement: s1 [file s1 › crystals-2794290-supplementary.pdf]

## Electronic Support Information

### Phase formation in $\text{NaH}_2\text{PO}_4\text{--VOSO}_4\text{--NaF--H}_2\text{O}$ system and rapid synthesis of $\text{Na}_3\text{V}_2\text{O}_{2x}(\text{PO}_4)_2\text{F}_{3-2x}$

Zhi Lin

Department of Chemistry, CICECO, University of Aveiro, 3810-193, Aveiro, Portugal

e-mail: [zlin@ua.pt](mailto:zlin@ua.pt)

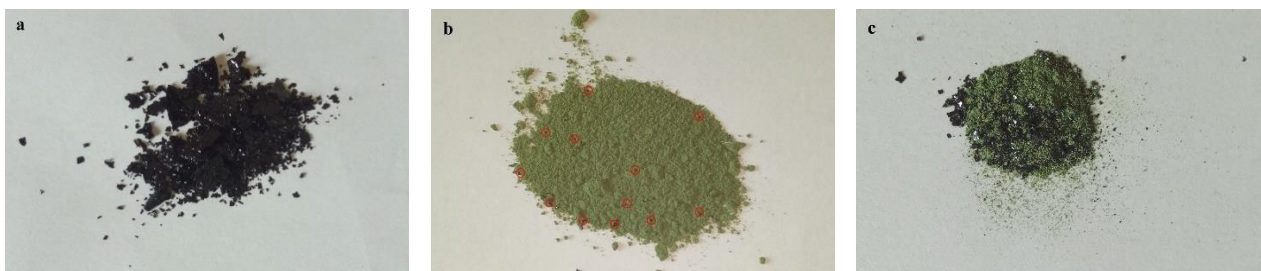

**Figure S1** Photos of samples without adding sodium fluoride and 1 day's synthesis (a), with a F/V molar ratio of 0.1 in starting mixture and 1 day's synthesis (b) and 3 days' synthesis (c).

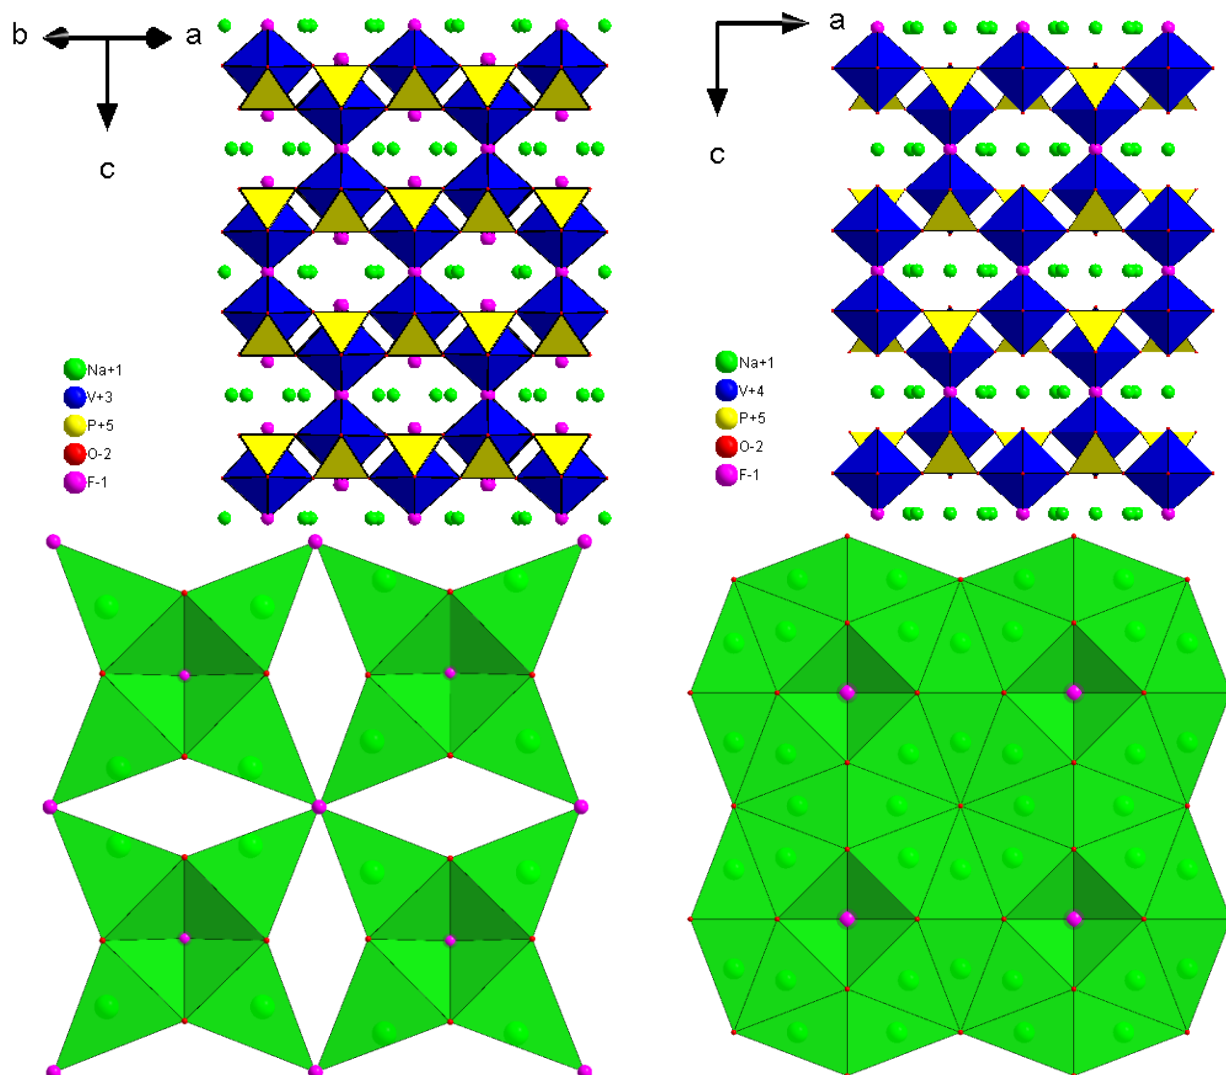

**Figure S2** Structure representations of  $\text{Na}_3\text{V}_2(\text{PO}_4)_2\text{F}_3$  (top left),  $\text{Na}_3(\text{VO})_2(\text{PO}_4)_2\text{F}$  (top right) and sodium positions in the structure (bottom).

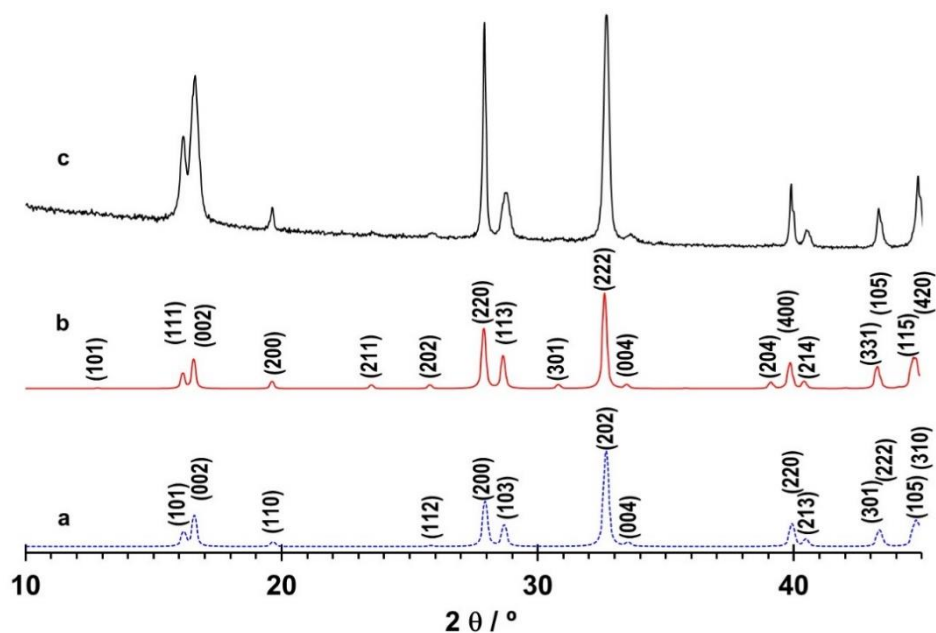

**Figure S3** Powder XRD patterns of simulated ones for  $\text{Na}_3(\text{VO})_2(\text{PO}_4)_2\text{F}$  (a) and  $\text{Na}_3\text{V}_2(\text{PO}_4)_2\text{F}_3$  (b); and for a sample with a F/V molar ratio of 0.7 in starting mixture and synthesized at 170 °C for 1 day (c).

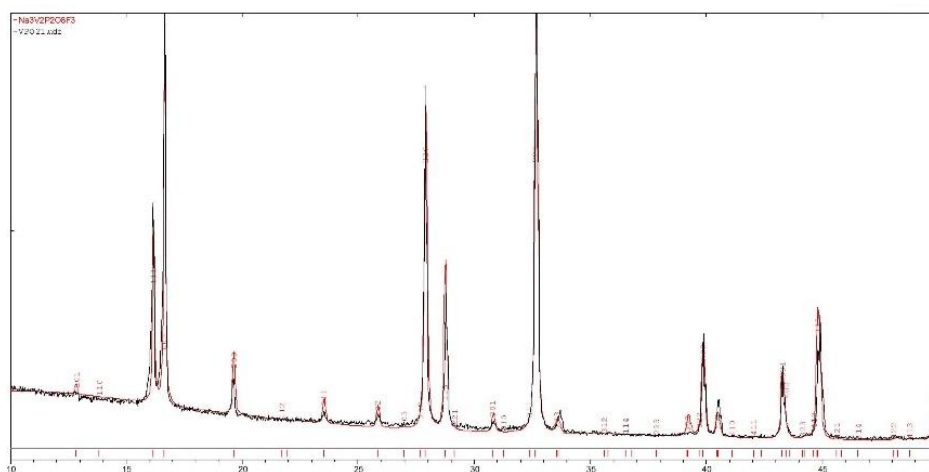

**Figure S4** Cell parameter fit using space group  $\text{P4}_2/\text{mmn}$ .

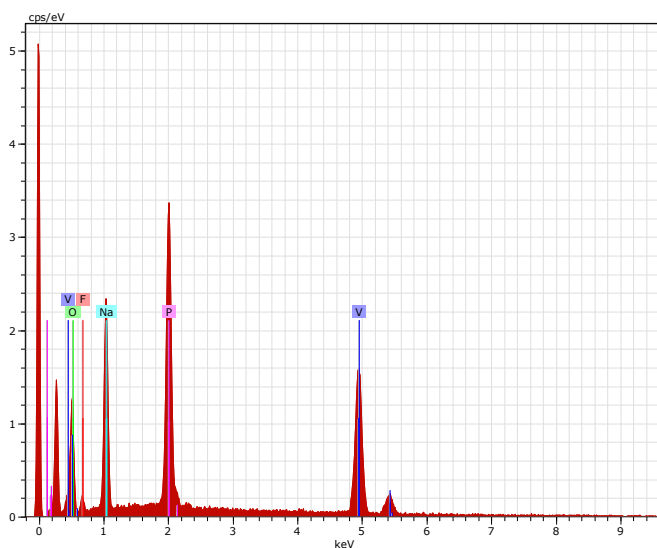

**Figure S5** Energy dispersive X-ray spectrometry of a sample with a F/V molar ratio of 0.7 in starting mixture and synthesized at 170 °C for 1 day.

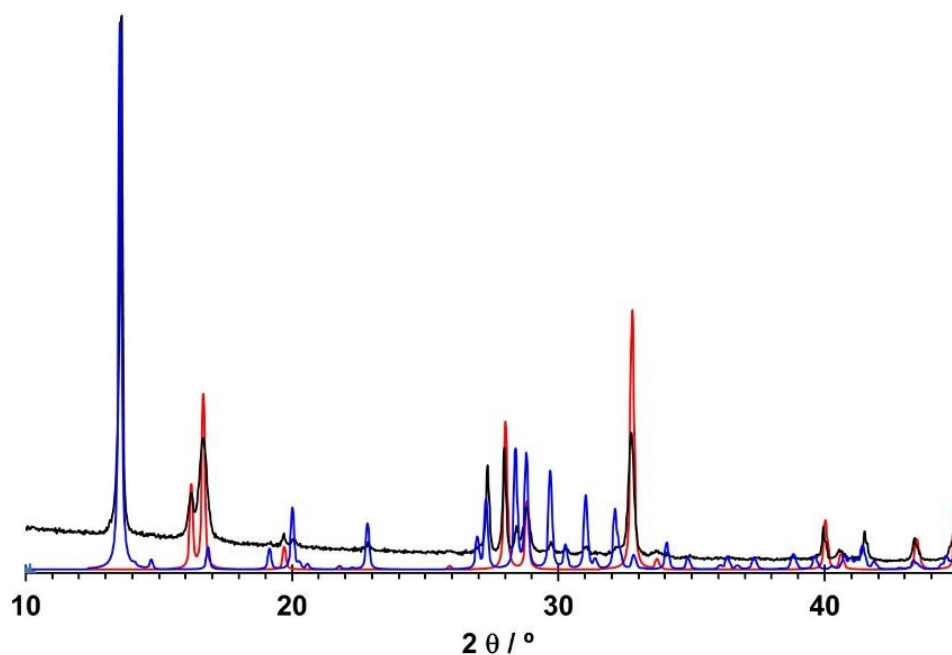

**Figure S6** Powder XRD patterns of simulated ones for  $\text{Na}(\text{VO})_2(\text{PO}_4)_2(\text{H}_2\text{O})_4$  (blue) and  $\text{Na}_3(\text{VO})_2(\text{PO}_4)_2\text{F}$  (red); and for a sample with a F/V molar ratio of 0.7 in starting mixture and synthesized at 170 °C for 3 day (black).

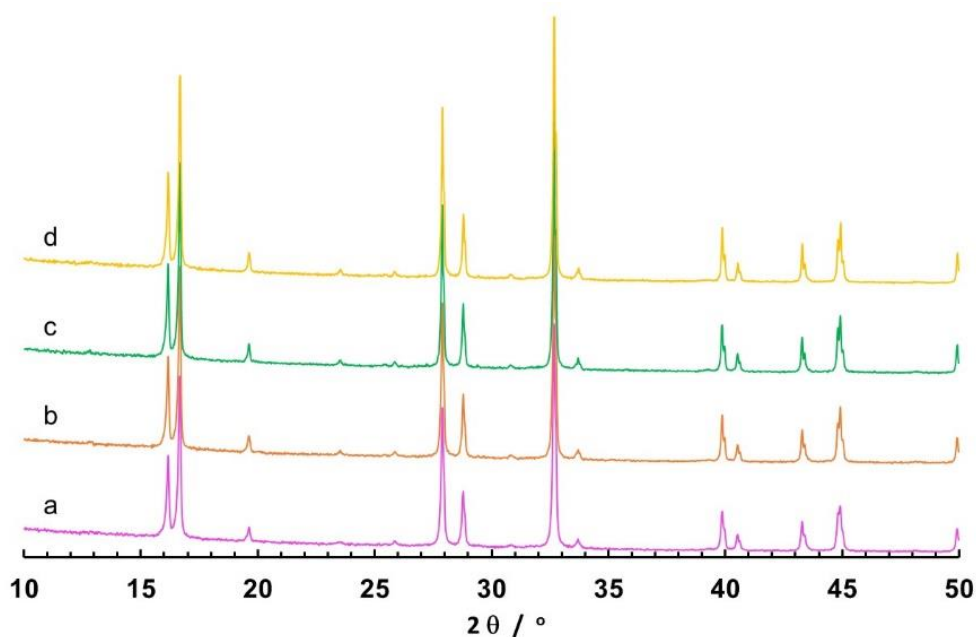

**Figure S7** Powder XRD patterns of samples with a F/V molar ratio of 2.1 and synthesized at 170 °C for 1 day (a); 3 days (b); and with double amount of water and synthesized at 170 °C for 1 day (c); 3 days (d).

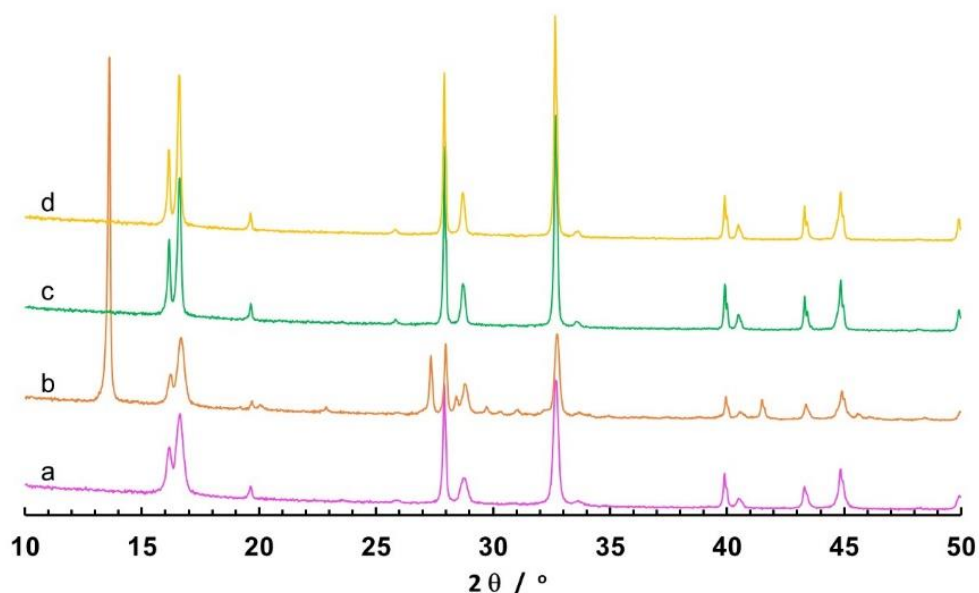

**Figure S8** Powder XRD patterns of samples with a F/V molar ratio of 0.7 and synthesized at 170 °C for 1 day (a); 3 days (b); and with double amount of water and synthesized at 170 °C for 1 day (c); 3 days (d).

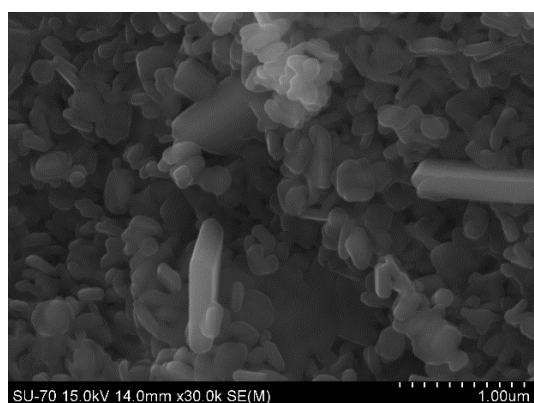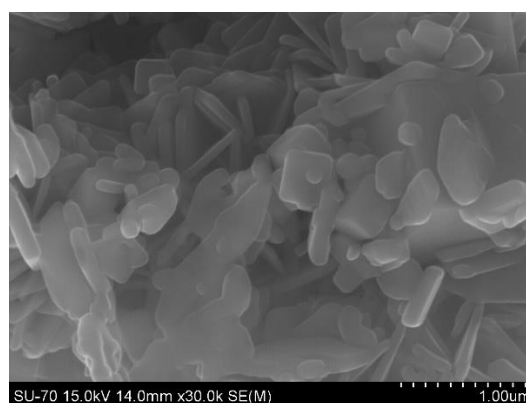

**Figure S9** SEM of samples with a F/V molar ratio of 0.7, a  $\text{H}_2\text{O}/\text{V}$  molar ratio of 70 (left) and 140 (right) in starting mixture and synthesized at 170 °C for 1 day.

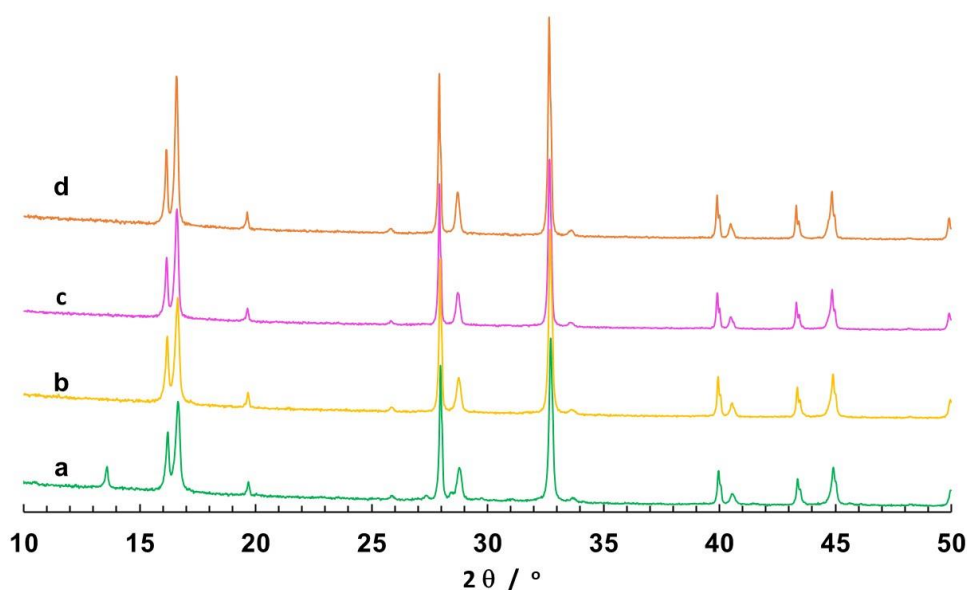

**Figure S10** Powder XRD patterns of samples with a F/V molar ratio of 0.7 in starting mixture and synthesized at 170 °C for 2 hours (a), 5 hours (b), 1 day (c) and 3 days (d).

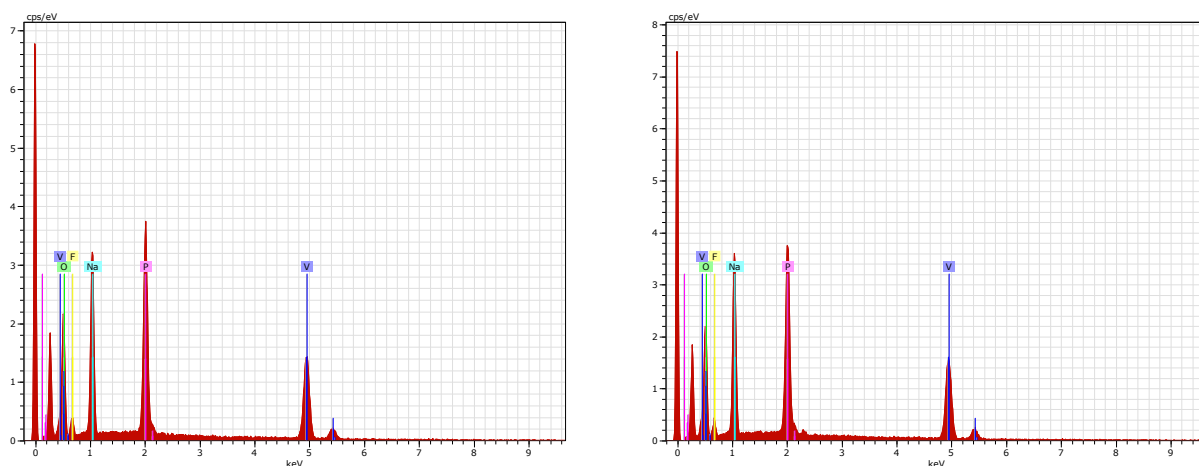

**Figure S11** Energy dispersive X-ray spectrometry of samples with a  $\text{H}_2\text{O}/\text{V}$  molar ratio of 140 in starting mixture and synthesized at 170 °C for 2 hours with a  $\text{F}/\text{V}$  molar ratio of 2.1 (left) and 5 hours with a  $\text{F}/\text{V}$  molar ratio of 0.7 (right), respectively.

Table S1. FT-IR peaks of selected samples (See sample number in Table 1).

| sample |      |      |      |      | V-O | V-F  |      |
|--------|------|------|------|------|-----|------|------|
| 3      | 1138 |      |      | 1045 | 926 | 952  | 793  |
| 8      |      |      |      |      | 921 | 948  | 795  |
| 9      | 1138 | 1122 | 1053 | 1043 | 922 | 952  | 795  |
| 10     | 1139 | 1127 | 1056 | 1042 | 926 | 952  | 789  |
| 5      | 1155 | 1118 | 1061 |      | 918 | 948  | no   |
| 6      | 1159 | 1119 | 1059 |      | 918 | 945  | no   |
| 13     | 1155 | 1121 | 1061 |      | 919 | 950  | no   |
| 11     | 1155 | 1121 | 1057 | 1040 | 919 | weak | weak |
